# Supplementary material for: Exploring the optical reporting characteristics of drugs: UV-Vis spectra and conformations of the tyrosine kinase inhibitor SKF86002
Source: Royal Society of Chemistry journal article supplement (doi:10.1039/c7nj03361c), 2017-01-01
Supplement: c7nj03361c1.pdf [file c7nj03361c1.pdf]

## Supplementary Materials

**Table S1.** Selected geometrical parameters and other properties of the global minimum structure, SKF86002B, compared with conformers SKF86002A, SKF86002C and SKF86002D\*

| Parameters                                                                | SKF86002B | SKF86002A<br>(Δ) | SKF86002C<br>(Δ) | SKF86002D<br>(Δ) |
|---------------------------------------------------------------------------|-----------|------------------|------------------|------------------|
| <b>R1<sup>a</sup></b>                                                     | 8.382     | 8.383 (-0.001)   | 8.412 (-0.030)   | 8.373 (+0.009)   |
| <b>R2a<sup>a</sup></b>                                                    | 6.856     | 6.852 (+0.004)   | 7.007 (-0.151)   | 6.78 (+0.076)    |
| <b>R2b<sup>a</sup></b>                                                    | 7.987     | 7.985 (+0.002)   | 7.959 (+0.028)   | 7.896 (+0.091)   |
| <b>R3<sup>a</sup></b>                                                     | 8.283     | 8.283 (0.000)    | 8.341 (-0.058)   | 8.256 (+0.027)   |
| <b><u>Bond length (Å)</u></b>                                             |           |                  |                  |                  |
| C <sub>(21)</sub> -F <sub>(2)</sub>                                       | 1.361     | 1.361 (0.000)    | 1.349 (+0.012)   | 1.34 (+0.021)    |
| C <sub>(10)</sub> -C <sub>(12)</sub>                                      | 1.474     | 1.474 (0.000)    | 1.512 (-0.038)   | 1.43 (+0.044)    |
| C <sub>(8)</sub> -N <sub>(4)</sub>                                        | 1.308     | 1.309 (-0.001)   | 1.336 (-0.028)   | 1.31 (-0.002)    |
| C <sub>(8)</sub> -N <sub>(3)</sub>                                        | 1.366     | 1.362 (+0.004)   | 1.402 (-0.036)   | 1.36 (+0.006)    |
| C <sub>(8)</sub> -S <sub>(1)</sub>                                        | 1.765     | 1.766 (-0.001)   | 1.730 (+0.035)   | 1.72 (+0.045)    |
| C <sub>(9)</sub> -S <sub>(1)</sub>                                        | 1.856     | 1.857 (-0.001)   | 1.791 (+0.065)   | 1.84 (+0.016)    |
| C <sub>(7)</sub> -C <sub>(11)</sub>                                       | 1.468     | 1.468 (0.000)    | 1.491 (-0.023)   | 1.44 (+0.028)    |
| C <sub>(20)</sub> -N <sub>(5)</sub>                                       | 1.342     | 1.342 (0.000)    | 1.361 (-0.019)   | 1.35 (-0.008)    |
| C <sub>(19)</sub> -N <sub>(5)</sub>                                       | 1.340     | 1.339 (+0.001)   | 1.355 (-0.015)   | 1.35 (-0.010)    |
| C <sub>(10)</sub> -C <sub>(7)</sub>                                       | 1.395     | 1.397 (-0.002)   | 1.431 (-0.036)   | 1.39 (+0.005)    |
| N <sub>(3)</sub> -C <sub>(6)</sub>                                        | 1.460     | 1.458 (+0.002)   | 1.491 (-0.031)   | 1.45 (+0.01)     |
| <b><u>Bond angle (°)</u></b>                                              |           |                  |                  |                  |
| C <sub>(8)</sub> -S <sub>(1)</sub> -C <sub>(9)</sub>                      | 88.94     | 88.63 (+0.31)    | 93.74 (-4.80)    | 91.72 (-2.78)    |
| N <sub>(3)</sub> -C <sub>(6)</sub> -C <sub>(9)</sub>                      | 104.33    | 104.67 (-0.34)   | 109.66 (-5.33)   | 106.45 (-2.12)   |
| C <sub>(10)</sub> -N <sub>(4)</sub> -C <sub>(8)</sub>                     | 104.86    | 104.92 (-0.06)   | 106.54 (-1.68)   | 103.06 (+1.80)   |
| C <sub>(7)</sub> -N <sub>(3)</sub> -C <sub>(6)</sub>                      | 134.44    | 136.21 (-1.77)   | 141.45 (-7.01)   | 133.45 (+0.99)   |
| N <sub>(4)</sub> -C <sub>(8)</sub> -S <sub>(1)</sub>                      | 132.86    | 133.4 (-0.54)    | 132.42 (+0.44)   | 134.40 (-1.54)   |
| <b><u>Dihedral angle (°)</u></b>                                          |           |                  |                  |                  |
| C <sub>(14)</sub> -C <sub>(11)</sub> -C <sub>(7)</sub> -C <sub>(10)</sub> | -47.90    | 42.63 (-90.53)   | -52.78 (+4.88)   | -90.15 (+42.25)  |
| C <sub>(16)</sub> -C <sub>(12)</sub> -C <sub>(10)</sub> -N <sub>(4)</sub> | 148.12    | 30.35 (+117.77)  | 164.89 (-16.77)  | 90.34 (+57.78)   |
| N <sub>(3)</sub> -C <sub>(8)</sub> -S <sub>(1)</sub> -C <sub>(9)</sub>    | 9.99      | 15.1 (-5.11)     | -1.70 (+11.69)   | 10.16 (-0.17)    |
| C <sub>(10)</sub> -N <sub>(4)</sub> -C <sub>(8)</sub> -N <sub>(3)</sub>   | 1.66      | 0.32 (+1.34)     | -0.19 (+1.85)    | -0.17 (+1.83)    |

|                                                                           |              |                  |                  |                 |
|---------------------------------------------------------------------------|--------------|------------------|------------------|-----------------|
| <b>C<sub>(8)</sub>-S<sub>(1)</sub>-C<sub>(9)</sub>-C<sub>(6)</sub></b>    | -25.42       | -26.8 (+1.38)    | 2.84 (-28.26)    | -18.56 (-6.86)  |
| <b>N<sub>(3)</sub>-C<sub>(6)</sub>-C<sub>(9)</sub>-S<sub>(1)</sub></b>    | 33.75        | 31.44 (+2.31)    | -3.28 (+37.03)   | 21.85 (+11.90)  |
|                                                                           |              |                  | 178.43           |                 |
| <b>N<sub>(4)</sub>-C<sub>(8)</sub>-S<sub>(1)</sub>-C<sub>(9)</sub></b>    | -175.55      | -166.14 (-9.41)  | (-353.98)        | -169.42 (-6.13) |
| <b>C<sub>(11)</sub>-C<sub>(7)</sub>-N<sub>(3)</sub>-C<sub>(6)</sub></b>   | -19.65       | -8.51 (-11.14)   | -0.39 (-19.26)   | -1.94 (-17.71)  |
| <b>C<sub>(12)</sub>-C<sub>(10)</sub>-C<sub>(7)</sub>-C<sub>(11)</sub></b> | -4.85        | 6.53 (-11.38)    | 1.95 (-6.80)     | -0.19 (-4.66)   |
| <b>&lt;R<sup>2</sup>&gt; (a.u.)</b>                                       |              | 7311.3428        | 7569.4695        | 6976.9344       |
|                                                                           | 7310.6635    | (-0.6793)        | (-258.8060)      | (+333.7291)     |
| <b>μ (D)</b>                                                              | 5.34         | 5.37 (-0.03)     | 5.92 (-0.58)     | 5.34 (0.00)     |
| <b>E (E<sub>h</sub>)</b>                                                  |              | -1279.2433       | -1278.0769       | -1278.082       |
|                                                                           | -1279.243354 | (-0.00008)       | (-1.16645)       | (-1.16132)      |
| <b>ZPE (kcal·mol<sup>-1</sup>)</b>                                        | 157.14303    | 157.09623        | 155.64052        | 157.43193       |
|                                                                           |              | (+0.04680)       | (+1.50251)       | (-0.28890)      |
| <b>E + ZPE (E<sub>h</sub>)</b>                                            | -1278.993197 | -1278.9929       | -1278.9761       | -1278.9733      |
|                                                                           |              | (-0.00027)       | (-0.01713)       | (-0.01995)      |
| <b>HOMO-LUMO gap (eV)</b>                                                 | 0.17         | 0.16 (+0.01)     | 0.16 (+0.01)     | 0.18 (-0.01)    |
| <b>Rotational Const. A (GHz)</b>                                          | 0.3550       | 0.3560           |                  | 0.3771          |
|                                                                           |              | (-0.0010)        | 0.3451 (+0.0099) | (-0.0221)       |
| <b>B (GHz)</b>                                                            | 0.2098       | 0.2095 (+0.0003) | 0.2029 (+0.0069) | 0.2091          |
|                                                                           |              | 0.1373           |                  | (+0.0007)       |
| <b>C (GHz)</b>                                                            | 0.1374       | (+0.0001)        | 0.1318 (+0.0056) | 0.1486          |
|                                                                           |              |                  |                  | (-0.0112)       |

\* Using the B3LYP/6-31+G\* level of theory.

<sup>a</sup>. Perimeters [17] of the fluorophenyl (R1), imidazolyl (R2a), thiophenyl (R2b) and pyridinyl (R3) aromatic rings, respectively.
